# Supplementary material for: Apoptosis Activation in Human Lung Cancer Cell Lines by a Novel Synthetic Peptide Derived from Conus californicus Venom
Source: MDPI journal article supplement (doi:10.3390/toxins8020038), 2016-02-05
Supplement: s1 [file s1]

## Supplementary Materials: Apoptosis Activation in Human Lung Cancer Cell Lines by a Novel Synthetic Peptide Derived from *Conus californicus* Venom

Irasema Oroz-Parra, Mario Navarro, Karla E. Cervantes-Luevano, Carolina Álvarez-Delgado, Guy Salvesen, Liliana N. Sanchez-Campos and Alexei F. Licea-Navarro

A

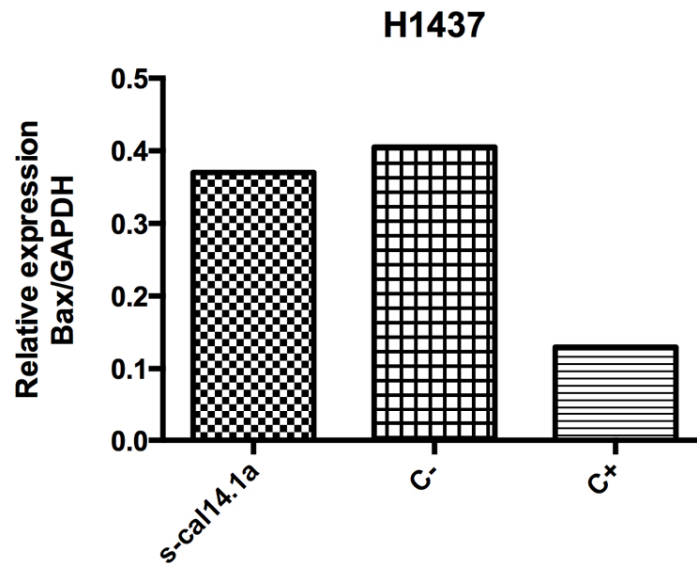

B

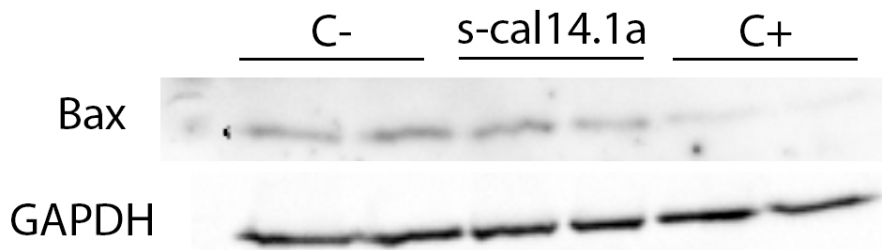

**Figure S1.** BAX protein levels expression. H1437 cells were seeded and incubated at standard culture conditions for 24 h. Cells were either treated for 24 h with 27  $\mu$ M of the synthetic peptide s-cal14.1a, 1  $\mu$ M staurosporine (C+) or left untreated (C-). Total protein was extracted and separated by SDS-PAGE. Protein expression was analyzed by Western blot, using monoclonal antibodies against Bax (sc-7480) and GAPDH (sc-sc-365062). GAPDH was used as a loading control and the results are shown as the relative expression of Bax/GAPDH and are representative of two experiments. (A) Densitometric analysis of Bax protein expression. (B) Western blots for Bax (upper panel) and GAPDH (lower panel).

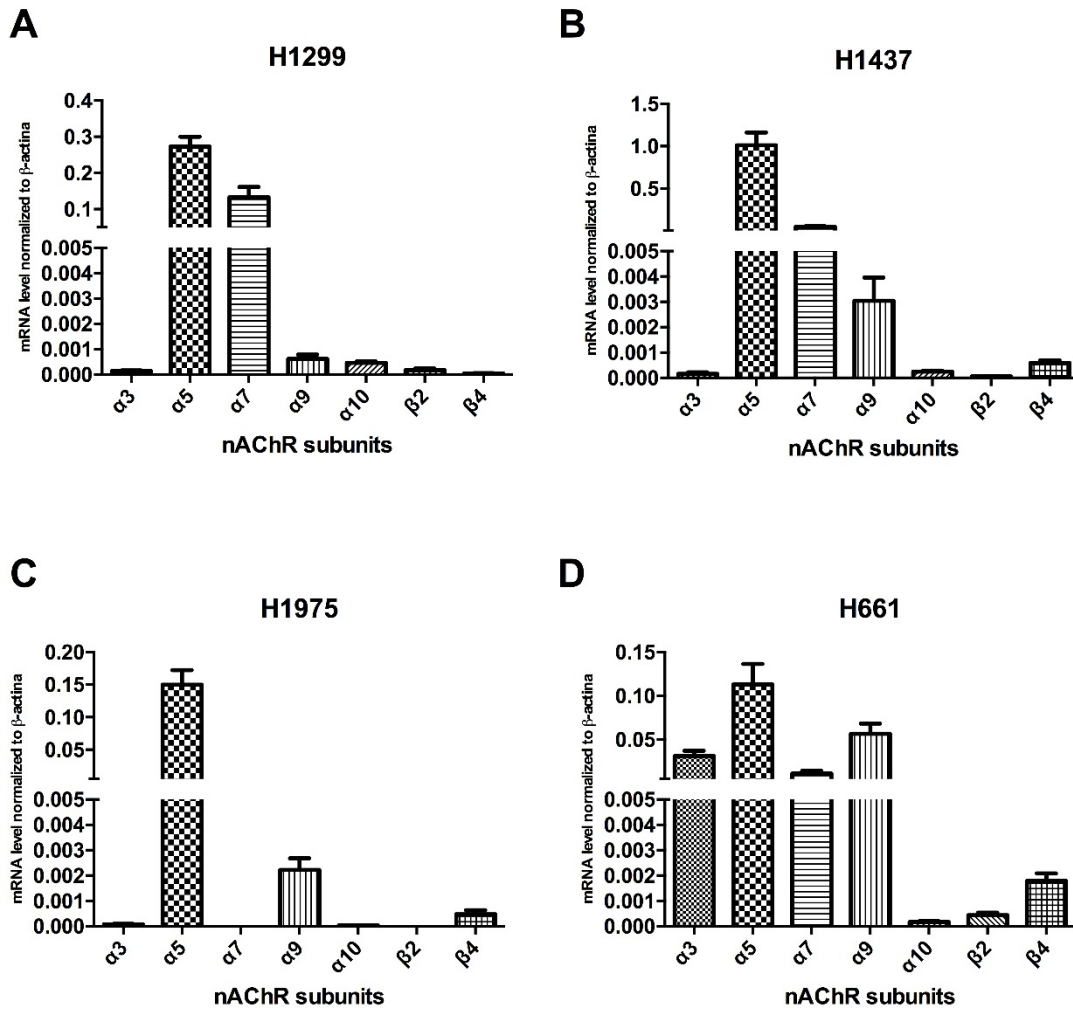

**Figure S2.** mRNA expression of nAChR subunits in H1299 (A), H1437 (B), H1975 (C) and H661 (D) cell lines. Total RNA was isolated and treated with DNase, 2  $\mu$ g were reverse-transcribed with SuperScript III Kit, using oligodT<sub>20</sub> and a random hexamer. mRNA levels were compared by RT-qPCR. Results were normalized to the  $\beta$ -actin gene and expressed as the mean  $\pm$  SD.
